# Supplementary material for: Factor H interferes with the adhesion of sickle red cells to vascular endothelium: a novel disease-modulating molecule
Source: PubMed Central journal article supplement — Haematologica. 2019 Jan 10;104(5):919–28. doi: 10.3324/haematol.2018.198622 (PMC6518911; doi:10.3324/haematol.2018.198622), 2019-05
Supplement: 2018_198622-Disclosures_and_Contributions.pdf [file 2018_198622-Disclosures_and_Contributions.pdf]

Haematologica  
HAEMATOL/2018/198622  
Version 4

Factor H interferes with the adhesion of sickle red cells to vascular endothelium: a novel disease modulating molecule

Elisabetta Lombardi, Alessandro Matte, Antonio M. Risitano, David Ricklin, John D. Lambris, Denise De Zanet, Sakari T. Jokiranta, Nicola Martinelli, Cinzia Scambi, Gianluca Salvagno, Zeno Bisoffi, Chiara Colato, Angela Siciliano, Oscar Bortolami, Mario Mazzuccato, Francesco Zorzi, Luigi De Marco, and Lucia De Franceschi

Disclosures: The authors have nothing to disclose

Contributions: EL and AM carried out the experiments, analyzed data and contributed to manuscript preparation; LDF, LDM, AMR, JDL, RD, CC designed the experiments, analyzed data and wrote the manuscript; MM contributed to manuscript preparation; ZD developed the algorithm analyzed data and contributed to manuscript preparation; SGL carried out the biochemical and the hematologic analysis; AS carried out experiments; CS carried out ELISA assays and contributed to data discussion; NM and OB carried out the statistical analyses, FZ and ZB selected patients, collected blood samples and contributed to data discussion.
