# Supplementary material for: Factor H interferes with the adhesion of sickle red cells to vascular endothelium: a novel disease-modulating molecule
Source: PubMed Central journal article supplement — Haematologica. 2019 Jan 10;104(5):919–28. doi: 10.3324/haematol.2018.198622 (PMC6518911; doi:10.3324/haematol.2018.198622), 2019-05
Supplement: HAEMATOL-2018-198622v4-Lombardi-01.pdf [file HAEMATOL-2018-198622v4-Lombardi-01.pdf]

## "Stop-and-go" motion of sickle red blood cells on TNF- $\alpha$ activated vascular endothelial surfaces and the role of Factor H inhibitor

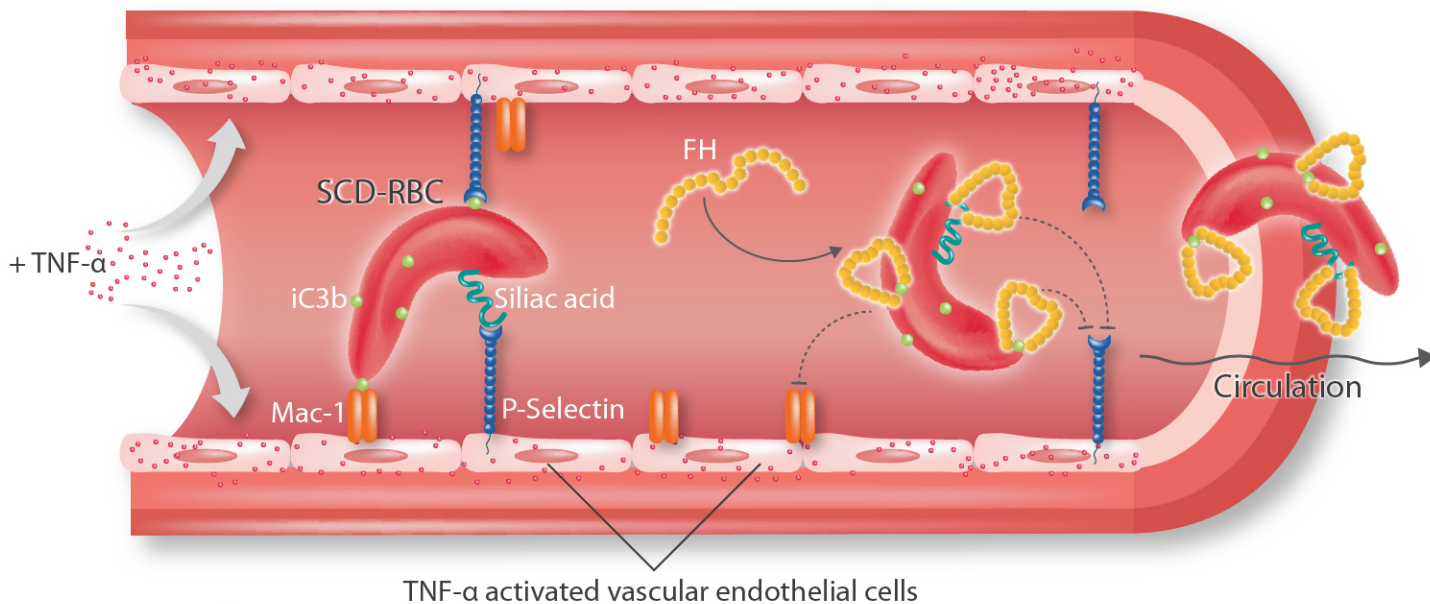

- FH segment normalized the transit of sickle cell disease red blood cells (SCD-RBCs) across the TNF- $\alpha$  activated vascular endothelial surface, abolishing the "stop-and-go" behavior of the sickle RBCs
- This effect positively affected the transit time of sickle RBCs, reducing the likelihood of the RBCs to sickle during their transit of the microcirculation
